# Supplementary material for: Analyses of Long Noncoding RNA and mRNA Profiles in Subjects with the Phlegm‐Dampness Constitution
Source: Hindawi journal article supplement (doi:10.1155/2021/4896282), 2021-01-01
Supplement: f1 [file 4896282.f1.pdf]

## Supplementary material

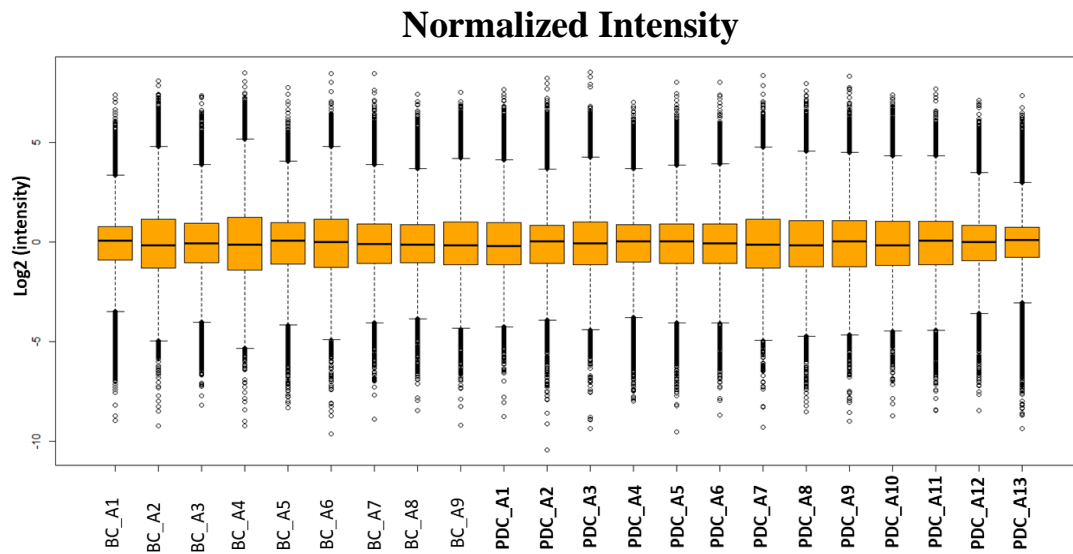

**Fig. S1. Box plots summarizing the lncRNA and mRNA profiles.** After normalization, the distributions of the log<sub>2</sub>-ratios of fluorescence signals in phlegm-dampness constitution (PDC) samples were nearly identical among balanced constitution (BC) samples.

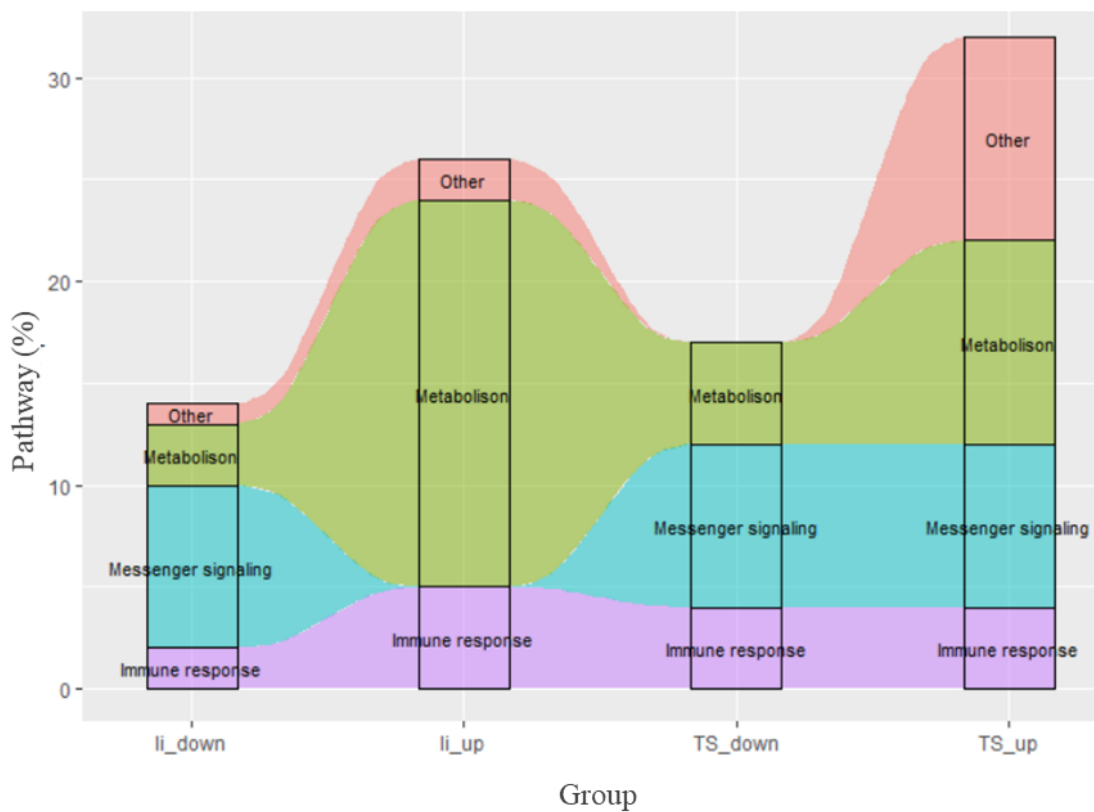

**Fig. S2. The reproducibility of the pathway was researched by IPA between this study and previous studies.** The TS\_up and TS\_down respectively represents the up-regulated and down-regulated mRNAs of this study. The li\_up and li\_down respectively represents the up-regulated and down-regulated mRNAs of L. Li's paper <sup>[1]</sup>.

## References

- [1] L. Li, J. Feng, H. Yao, L. Xie, Y. Chen, L. Yang, S. Hou, S. Zhao, R. Sun, Y. Wu, T. Bai, Y. Li, R. Yu, J. Wang, Q. Wang, Gene expression signatures for phlegm-dampness constitution of Chinese medicine, *Sci China Life Sci* 60(1) (2017) 105-107.

**Table S1. LncRNA RT- qPCR primers and product sizes.**

| lncRNA ID     | Forward primer (5'- >3') | Reverse primer (5'- >3') | Size of PCR Product (bp) |
|---------------|--------------------------|--------------------------|--------------------------|
| CA3           | TCTCCAGTGCTGAGAACGA      | CTCACCACCCTGTTATTGAT     | 82                       |
| RFTN1         | CTCCTTAGACCACCCGAC       | ACTGAGGTATAACACCAACGA    | 86                       |
| PIP4K2A       | ACCGGCTTAATGTTGATGG      | CTGTAGAGCCCTTTAAGTCGTA   | 101                      |
| ORAI3         | CTTTGCCCTGCATTTCTACC     | AGGCGATTCAGTTCCTCT       | 81                       |
| ARHGEF9       | TATGATGATGCTGGAGTGGAC    | AGAAGTGCTGCAACATGG       | 93                       |
| TTY15         | GTATGATTGGCCTTAGAGCAC    | TCATCCTATCAACTGACCTTCC   | 85                       |
| RP11-317J10.2 | ACTGTGCTTACAGGGCCTA      | CCGTGGATGGAGTCAAGT       | 88                       |
| LINC00690     | AGATCTTCCAAGTCCAGCCA     | AGAGGGAAGGGATGTGTC       | 94                       |
| RP11-809C18.3 | TGGGGAATTCTGGCTGAG       | TCAGCACAAATGTTAGCATTGA   | 118                      |
| AC135048.13   | TAGCCACCATTTCCATTCCTAT   | CTGGGAAACAGACTGTCTCA     | 97                       |

**Table S2. The top 100 co-expression network (CNC) of 421 differentially expressed mRNAs and 357 lncRNAs were involved ( $P < 0.05$ ,  $|PCC| > 0.7$ ). (PCC: Pearson correlation coefficient).**

| mRNA      | LncRNA        | Correlation | P-value  |
|-----------|---------------|-------------|----------|
| SLC45A4   | RP11-707G14.6 | 0.9895119   | 1.36E-10 |
| CARD17    | LINC00703     | 0.984012    | 1.36E-09 |
| GDI2      | AC004158.2    | 0.9838924   | 1.42E-09 |
| TRH       | CTB-102L5.7   | 0.9826928   | 2.10E-09 |
| MCPH1     | CTD-2541M15.4 | 0.9826714   | 2.12E-09 |
| TRH       | SACS-AS1      | 0.9805585   | 3.97E-09 |
| HRSP12    | RP11-61L19.3  | 0.9782015   | 7.42E-09 |
| C17orf78  | RP11-331F9.3  | 0.976173    | 1.21E-08 |
| Q93YZ4    | RP11-168C9.1  | 0.9745898   | 1.71E-08 |
| FAM90A1   | RP11-482D24.3 | 0.9731323   | 2.32E-08 |
| TTC39C    | AC004067.5    | 0.97306     | 2.35E-08 |
| CARD8     | MIR296        | 0.9711006   | 3.45E-08 |
| CEP350    | RP11-144G6.12 | 0.9710308   | 3.50E-08 |
| TTC39C    | CTD-2507G9.1  | 0.9684739   | 5.54E-08 |
| LENG8     | CTB-102L5.7   | 0.968213    | 5.79E-08 |
| KRTAP13-3 | RP11-718I15.1 | 0.9674175   | 6.63E-08 |
| LACTB2    | AC004158.2    | 0.965052    | 9.70E-08 |
| MCPH1     | CTD-2336O2.1  | 0.9649822   | 9.81E-08 |
| KRTAP13-3 | AC023128.1    | 0.9643445   | 1.08E-07 |
| PEX13     | RP11-820L6.1  | 0.9630746   | 1.31E-07 |
| POLE2     | RP11-144G6.12 | 0.9627661   | 1.37E-07 |
| LENG8     | RP11-168C9.1  | 0.9611557   | 1.72E-07 |
| LACTB2    | DLEU2         | 0.9607576   | 1.82E-07 |
| PRKACB    | RP11-159H10.3 | 0.9603007   | 1.94E-07 |
| MCPH1     | RP11-65M17.1  | 0.9601132   | 1.99E-07 |
| FLJ44838  | RP11-864I4.3  | -0.960045   | 2.01E-07 |

|           |                |           |          |
|-----------|----------------|-----------|----------|
| RAB3IP    | RP11-192H23.8  | 0.9596123 | 2.13E-07 |
| LUZP6     | CTD-2589M5.5   | 0.9593015 | 2.22E-07 |
| SNX3      | CTD-2589M5.5   | 0.9590293 | 2.30E-07 |
| KRTAP13-3 | CTD-2532D12.4  | 0.9583467 | 2.51E-07 |
| ORAI3     | AC135048.13    | 0.9580502 | 2.61E-07 |
| ZCCHC18   | AC004158.2     | 0.9571166 | 2.94E-07 |
| OAT       | RP11-1028N23.4 | 0.9558822 | 3.43E-07 |
| RNF19A    | CTD-2589M5.5   | 0.9558968 | 3.43E-07 |
| PER3      | CTC-304I17.5   | 0.955858  | 3.44E-07 |
| GDI2      | ZCCHC18        | 0.9553168 | 3.68E-07 |
| ATF6B     | KB-1572G7.3    | 0.9549737 | 3.83E-07 |
| TMEM221   | CTD-2541M15.4  | 0.9546193 | 4.00E-07 |
| KRTAP13-3 | RP11-167P22.3  | 0.9544495 | 4.08E-07 |
| Q93YZ4    | CTB-102L5.7    | 0.9520167 | 5.41E-07 |
| PEX13     | AC023128.1     | 0.9508375 | 6.17E-07 |
| LENG8     | KB-1572G7.3    | 0.9508131 | 6.18E-07 |
| ZNF117    | RP11-159H10.3  | 0.9505038 | 6.40E-07 |
| PRKACB    | CTD-2541M15.4  | 0.9504253 | 6.45E-07 |
| TRH       | RP11-168C9.1   | 0.9501974 | 6.61E-07 |
| NCAPG2    | CTB-133G6.2    | 0.9476456 | 8.66E-07 |
| PPP1CC    | CTD-2589M5.5   | 0.9471303 | 9.13E-07 |
| DAZAP1    | ZCCHC18        | 0.9468264 | 9.42E-07 |
| SLC17A5   | AC004158.2     | 0.9461139 | 1.01E-06 |
| MCPH1     | RP1-290I10.3   | 0.9457305 | 1.05E-06 |
| C18orf25  | CTD-2541M15.4  | 0.9456015 | 1.06E-06 |
| ZDHHC2    | CTA-204B4.6    | 0.9455959 | 1.07E-06 |
| GJD2      | AC099344.3     | 0.9448587 | 1.15E-06 |
| HIP1R     | RP11-383C6.2   | 0.9447342 | 1.16E-06 |
| PRKACB    | AC114273.1     | 0.9440662 | 1.24E-06 |

|          |                |           |          |
|----------|----------------|-----------|----------|
| GDI2     | CTD-2541M15.4  | 0.9437577 | 1.27E-06 |
| DTX3     | RP11-705O3.1   | 0.9429145 | 1.38E-06 |
| YOD1     | RP11-702F3.3   | 0.9424639 | 1.44E-06 |
| CLIC2    | RP5-1073O3.2   | 0.941823  | 1.53E-06 |
| RAB3IP   | AC099684.1     | 0.9417726 | 1.54E-06 |
| HIP1R    | XLOC_001441    | 0.9415231 | 1.57E-06 |
| HRSP12   | RP11-430L16.1  | 0.9412279 | 1.62E-06 |
| FBXO5    | RP11-375D13.2  | 0.9409165 | 1.66E-06 |
| GYPA     | AC017048.1     | -0.940656 | 1.70E-06 |
| C8orf80  | RP11-215N21.1  | -0.940543 | 1.72E-06 |
| LACTB2   | RP11-144G6.12  | 0.9403463 | 1.75E-06 |
| SLC17A5  | ZCCHC18        | 0.9400605 | 1.80E-06 |
| Q93YZ4   | RP11-685F15.1  | 0.9395887 | 1.87E-06 |
| LRRIQ1   | CTD-2532D12.4  | 0.9394809 | 1.89E-06 |
| PRKACB   | AC004158.2     | 0.9395072 | 1.89E-06 |
| PRKACB   | RP1-290I10.3   | 0.9391295 | 1.95E-06 |
| SNX3     | RP11-702F3.3   | 0.939058  | 1.96E-06 |
| TDO2     | CTA-217C2.1    | 0.9388402 | 2.00E-06 |
| ZDHHC2   | RP11-61L19.3   | 0.9388561 | 2.00E-06 |
| GDI2     | DLEU2          | 0.9387404 | 2.02E-06 |
| ZNF304   | RP11-375D13.2  | 0.9387363 | 2.02E-06 |
| C17orf78 | CT64           | 0.9379785 | 2.16E-06 |
| ARL6IP1  | CTD-2589M5.5   | 0.937815  | 2.19E-06 |
| Q93YZ4   | RP11-839D17.2  | 0.9376711 | 2.22E-06 |
| MFHAS1   | CTD-2589M5.5   | 0.9374868 | 2.25E-06 |
| CAMTA1   | RP11-1028N23.4 | 0.9369385 | 2.36E-06 |
| FAM185A  | RP11-144G6.12  | 0.9366641 | 2.42E-06 |
| SLC5A7   | RP11-718I15.1  | 0.9364262 | 2.47E-06 |
| HIP1R    | RP11-125B21.2  | 0.9362374 | 2.50E-06 |

|          |                    |           |          |
|----------|--------------------|-----------|----------|
| C18orf25 | RP11-423H2.3       | 0.9359343 | 2.57E-06 |
| C17orf78 | LINC00264          | 0.9357893 | 2.60E-06 |
| HPRT1    | XLOC_12_01237<br>8 | 0.9354959 | 2.67E-06 |
| ZCCHC18  | XLOC_005857        | 0.934913  | 2.80E-06 |
| PRKACB   | RP11-65M17.1       | 0.9348794 | 2.81E-06 |
| FBXO30   | CTD-2589M5.5       | 0.9347795 | 2.83E-06 |
| DAZAP1   | AC004158.2         | 0.934507  | 2.89E-06 |
| MCPH1    | AC004158.2         | 0.9345314 | 2.89E-06 |
| INSL5    | CTB-133G6.2        | 0.9338976 | 3.04E-06 |
| MINPP1   | AC004158.2         | 0.9335128 | 3.14E-06 |
| FBXO30   | LINC00849          | 0.9330637 | 3.25E-06 |
| MCPH1    | RP11-159H10.3      | 0.9327146 | 3.34E-06 |
| POLE2    | DLEU2              | 0.9325059 | 3.40E-06 |
| FAM200B  | RP11-1028N23.4     | 0.9324354 | 3.42E-06 |
| ACSL3    | RP11-1028N23.4     | 0.9323484 | 3.44E-06 |
| ZCCHC18  | RP5-899B16.2       | 0.9317486 | 3.61E-06 |

**Table S3. Demographic and clinical characteristics of 21 subjects.**

| Variables                            | PDC (n = 9) | BC (n = 12) | P-value |
|--------------------------------------|-------------|-------------|---------|
| Male, n (%)                          | 42.66       | 58.33       | 0.56    |
| Age (years), Mean (SD)               | 36 ± 6.78   | 38 ± 5.68   | 0.36    |
| Body mass index (kg/m <sup>2</sup> ) | 23.12 ± 1.9 | 22.27 ± 2.3 | 0.25    |
